# Supplementary material for: Interfacial defect capture-induced abnormal fluorescence decay lifetime of CsPbBr3/CsPbBr3 nanodisks
Source: Royal Society of Chemistry journal article supplement (doi:10.1039/d4cc03918a), 2024-01-01
Supplement: d4cc03918a1.pdf [file d4cc03918a1.pdf]

# Electronic Supporting Information

## Interfacial Defect Capture-Induced Abnormal Fluorescence Decay Lifetime of CsPbBr<sub>3</sub> /CsPbBr<sub>3</sub> Nanodisks

Xuebin Zhang,<sup>a</sup> Kaiye Cheng,<sup>a</sup> Qin Xu,<sup>a</sup> Dandan Yang,<sup>\*a</sup> Haibo Zeng<sup>a, b</sup>

<sup>a</sup> *Institute of Innovation Materials and Energy, School of Chemistry and Chemical Engineering, Yangzhou University, Yangzhou, 225002, China.*

<sup>b</sup> *MIIT Key Laboratory of Advanced Display Materials and Devices, Institute of Optoelectronics & Nanomaterials, College of Materials Science and Engineering, Nanjing University of Science and Technology, Nanjing 210094, China.*

## Experimental section

**Materials:** Lead(II) oxide (PbO, 99.999%), lead(II) bromide (PbBr<sub>2</sub>, 99.999%), Cesium carbonate (Cs<sub>2</sub>CO<sub>3</sub>, 99.9%), Oleylamine (OAm, 80-90%), Oleic acid (OA, 90%), 1-octadecene (ODE, 90%), Manganese acetate tetrahydrate (Mn(OAc)<sub>2</sub>·4H<sub>2</sub>O, 99.7%), lead acetate trihydrate (Pb(OAc)<sub>2</sub>·3H<sub>2</sub>O, 99.99%), Sulfur powder (S, 99.99%), 1-dodecanethiol (1-DDT, 99.9%), Phenacyl bromide (C<sub>6</sub>H<sub>5</sub>COCH<sub>2</sub>Br, 98%), 1,3,5-Trimethylbenzene (AR, 97%), Ethyl acetate (EA, AR, 97%), Hexane (anhydrous, 99.5%) were purchased from Aladdin. All chemicals were used without any further purification.

**Preparation of Ce-oleate precursors:** Cs<sub>2</sub>CO<sub>3</sub> (0.36 g, 1.1 mmol), octadecene (15 mL) and oleic acid (1.5 mL) were added into 100 mL 3-neck flask, exhausted for half an hour at 120°C, and then heated under Ar to 150°C until all Cs<sub>2</sub>CO<sub>3</sub> reacted with OA. The solution was kept at 120°C to avoid solidification before injection.

**Preparation of Pb-oleate precursors:** Pb(OAc)<sub>2</sub>·3H<sub>2</sub>O (0.76 g, 2 mmol), octadecene (18.7 mL) and oleic acid (1.3 mL) were added into 100 mL 3-neck flask, exhausted for half an hour at 120 °C, and then heated under Ar to 150 °C until Pb(OAc)<sub>2</sub>·3H<sub>2</sub>O all reacted with OA. The solution was kept at 120 °C to avoid solidification before injection.

**Preparation of S-ODE precursors:** S (0.0048 g, 2 mmol) and octadecene (20 mL) were added into 100 mL 3-neck flask and degassed for 5 min. Then, the resulting mixture was sonicated until the complete dissolution of S.

**Synthesis of CsPbBr<sub>3</sub> QDs:** In a typical synthesis, PbBr<sub>2</sub> (0.2 g, 0.54 mmol), ODE (15 mL), OA (1.5 mL) and OAm (1.5 mL) were loaded into a 100 mL 3-neck flask and degassed for half an hour at 120°C under Ar flow. After complete dissolution of PbBr<sub>2</sub> salt, the temperature was increased to 160°C and then maintained for another 30 min under Ar atmosphere. The preheated Cs-oleate solution was swiftly injected into the transparent precursor solution. After 5 s, the reaction mixture was cooled down using a water bath.

**Synthesis of Cs<sub>3</sub>MnBr<sub>5</sub> precursors:** Mn (OAc)<sub>2</sub>·4H<sub>2</sub>O (0.196 g, 0.8 mmol), phenacyl bromide (0.5572 g, 2.8 mmol), OA (1 mL) and ODE (5 mL) were loaded into a 100 mL 3-neck flask and degassed for half an hour at 120°C under Ar flow. After that, the temperature was increased to 220°C followed by injection of 1 mL of OLA. Then, the temperature was cooled to 120°C and 0.5 mL of Cs-oleate solution was swiftly injected into the solution and annealed for 3 min. Finally, the reaction mixture was cooled down using a water bath. As synthesized QDs were centrifuged at 6000 rpm for 10 min, and precipitated nanocrystals were redispersed in 1,3,5-Trimethylbenzene (4 mL) for further use.

**Synthesis of CsPbBr<sub>3</sub>/CsPbBr<sub>3</sub> NDs:** PbO (0.044 g, 0.2 mmol), phenacyl bromide (0.1592 g, 0.8 mmol), OA (2 mL) and ODE (5 mL) were loaded into a 100 mL 3-neck flask and degassed for half an hour at 120°C under Ar flow. After that, the temperature was increased to 220°C followed by injection of 0.5 mL of OLA. Then, the temperature was cooled to 110°C and 0.4 mL of Cs<sub>3</sub>MnBr<sub>5</sub> precursors was swiftly injected into the solution and annealed for 5 min. Soon after the temperature was increased to 200°C followed by injection of Pb-oleate (0.5 mL), 1-DDT (20 µL) and S-ODE (0.6 mL) and annealed for 1 min.

Finally, the reaction mixture was cooled down using a water bath. Ethyl acetate was added into the crude solution with a volume ratio of 1:3 and the mixture were centrifuged for 1 min at 9000 rpm. The precipitate was dispersed in 2 mL of hexane to obtain a clear solution.

**Characterizations:** The transmission electron microscopy (TEM) images were taken on a transmission electron microscope (Tecnai 12). The HR-TEM images and EDS elemental mappings were taken on a field emission transmission electron microscope (Tecnai G2 F30 S-TWIN). Steady-state PL spectra were measured by the F-7000 fluorescence spectrometer 2014XHTM158. Ultraviolet-visible (UV-vis) absorption spectra were carried out with LAMBDA 650 spectrometer (PerkinElmer). The X-ray diffraction (XRD) was performed on a D8 ADVANCE diffractometer. The temperature-dependent PL and PLE spectra were measured with the Horiba Jobin Yvon Fluorolog-3 spectrometer. The temperature-dependent time-resolved decay data were performed on an Edinburgh FLS1000 fluorescence spectrometer. The absolute PLQY was determined using a Quantaaurus-QY absolute photoluminescence quantum yield spectrometer (C11347-11, Hamamatsu Photonics).

#### Fitting of temperature-dependent PL

To extract the exciton binding energy, the following simple expression for the dependence of the integrated emission intensity ( $I$ ) versus temperature ( $T$ ) is plotted, and fitted by using an Arrhenius equation.<sup>1,2</sup>

$$I(T) = \frac{I_0}{1 + Ae^{-E_a/k_B T}} \quad (1)$$

Where  $I_0$  represents the fluorescence intensity at 0 K,  $A$  is a pre-exponential factor, denotes the Boltzmann constant, and  $E_a$  is the activation energy for exciton dissociation.

#### Fitting of temperature-dependent FWHM

The temperature-dependent FWHM can be fitted by Boson model:<sup>3</sup>

$$\Gamma(T) = \Gamma_0 + \Gamma_{op} \exp\left(\frac{-E_{op}}{K_B T}\right) \quad (2)$$

In which the first term,  $\Gamma_0$ , is the inhomogeneous broadening and  $\Gamma_{op}$  describe the exciton-phonon contributions to the line width broadening.

#### Fitting of temperature-dependent bandgap

The temperature-dependent bandgap can be fitted by equation (3).<sup>4</sup>

$$E_g(T) = E_0 + A_{EP} \exp\left(\frac{-\hbar\omega}{K_B T}\right) \quad (3)$$

Where  $E_0$  is the unrenormalized bandgap,  $A_{EP}$  is the electron-phonon coupling coefficient, and  $\hbar\omega$  is the average energy of optical phonons.

#### Fitting of temperature-dependent Urbach energy values

To obtain Urbach energy values of CsPbBr<sub>3</sub> QDs and CsPbBr<sub>3</sub>/CsPbBr<sub>3</sub> NDs at different temperatures. It can be fitted using the formula provided to elucidate the relationship between Urbach energy and

temperature.

$$E_U(T) = E_U(0) + \frac{2E_U(0)}{\exp(\theta_E/T) - 1} \quad (4)$$

In the equation under discussion,  $E_U(0)$  represents the static component of Urbach energy ( $E_U$ ), which is independent of temperature and correlates with the intrinsic disorder within the material. The second term is referred to as the dynamic component of  $E_U$ , accounting for the contribution of phonons to the measured value of  $E_U$ . Here, T denotes the absolute temperature of the sample, and  $\theta_E$  represents the Einstein temperature of phonons, which is proportional to the phonon energy.

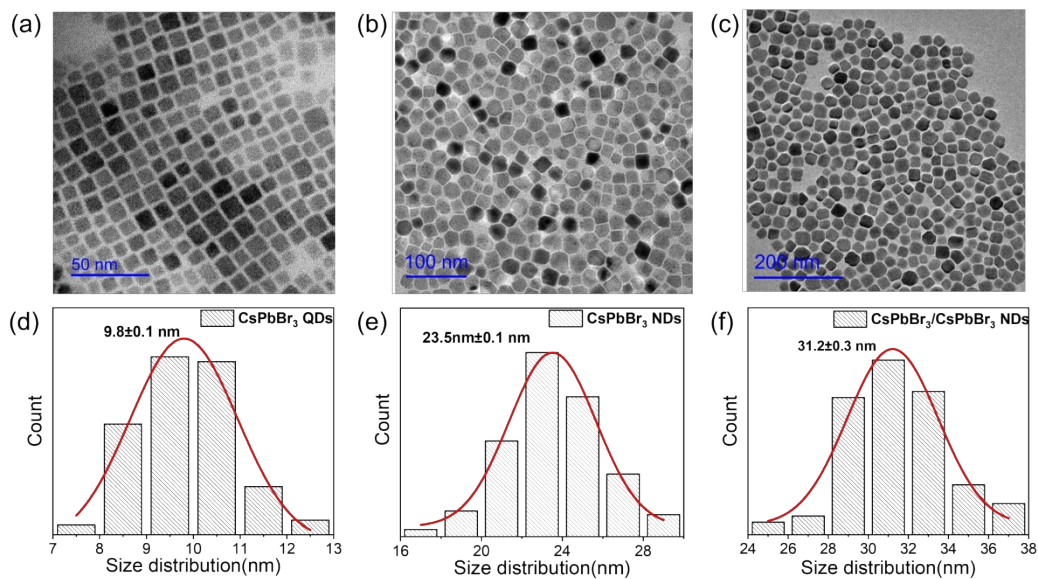

**Figure S1.** The TEM images of (a) CsPbBr<sub>3</sub> QDs, (b) CsPbBr<sub>3</sub> NDs, and (c) CsPbBr<sub>3</sub>/CsPbBr<sub>3</sub> NDs and corresponding size distribution of (d) CsPbBr<sub>3</sub> QDs, (e) CsPbBr<sub>3</sub> NDs, and (f) CsPbBr<sub>3</sub>/CsPbBr<sub>3</sub> NDs.

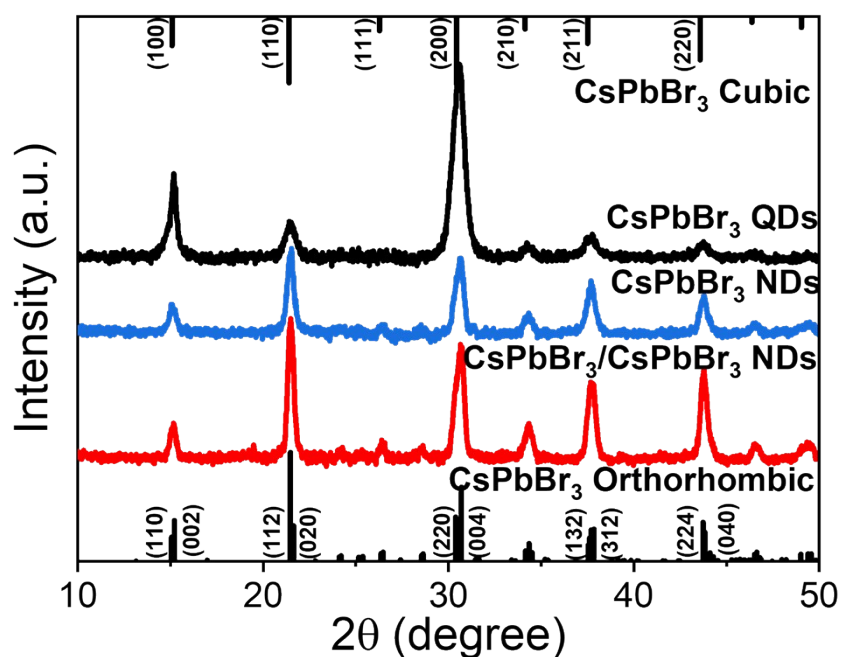

**Figure S2.** XRD patterns of CsPbBr<sub>3</sub> QDs, CsPbBr<sub>3</sub> NDs, and CsPbBr<sub>3</sub>/CsPbBr<sub>3</sub> NDs.

**Table S1.** The content of Cs, Pb, and Mn in CsPbBr<sub>3</sub>/CsPbBr<sub>3</sub> NDs by ICP-MS.

| Sample                                       | Cs(mg/L) | Pb(mg/L) | Mn(mg/L) |
|----------------------------------------------|----------|----------|----------|
| CsPbBr <sub>3</sub> /CsPbBr <sub>3</sub> NDs | 10.249   | 35.14    | 0.022    |

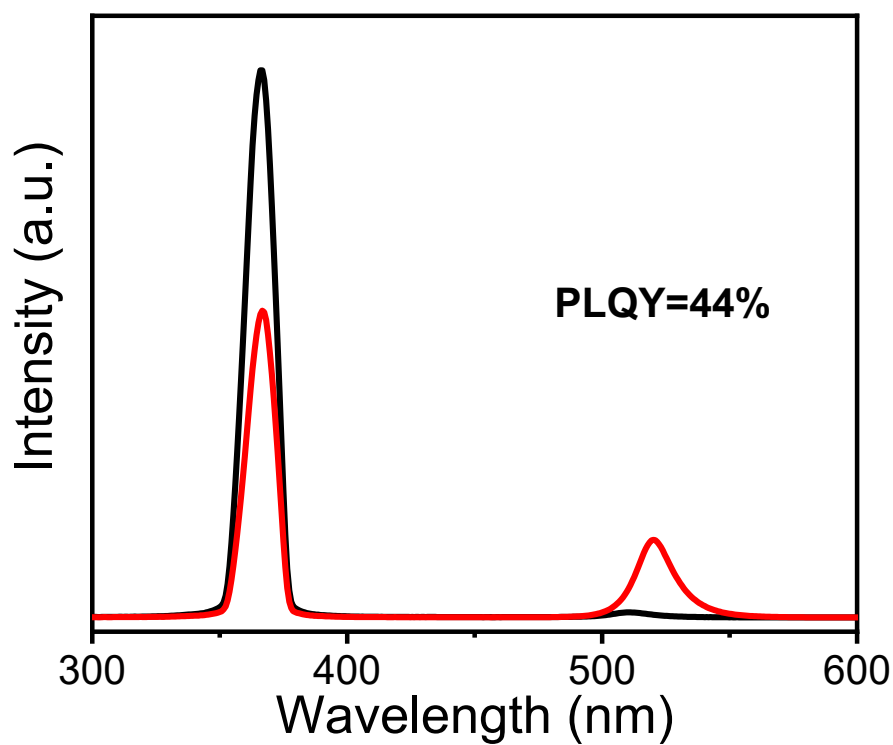

Figure S3. The PLQY value of CsPbBr<sub>3</sub> NDs.

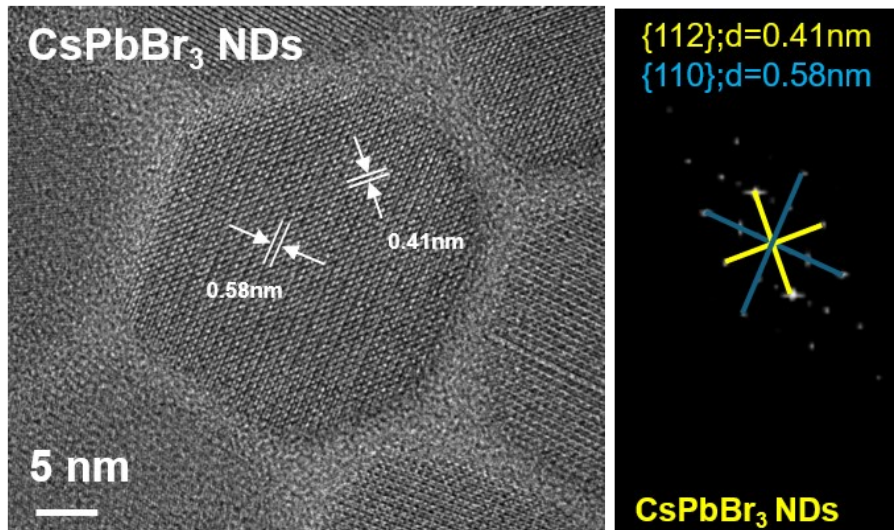

Figure S4. HR-TEM image(left) and FFT (right) of CsPbBr<sub>3</sub> NDs.

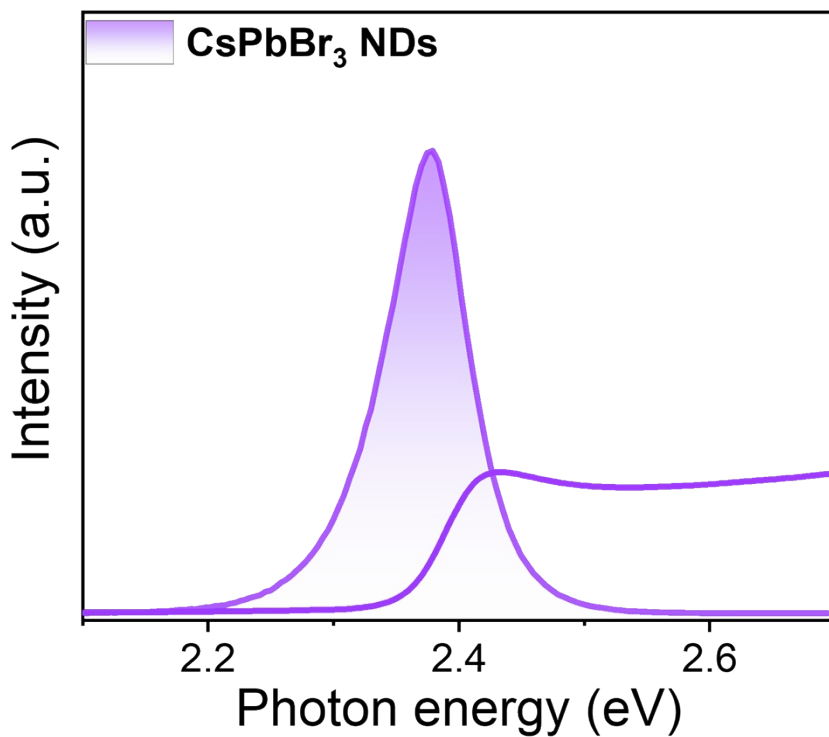

Figure S5. The PL and UV spectra of CsPbBr<sub>3</sub> NDs.

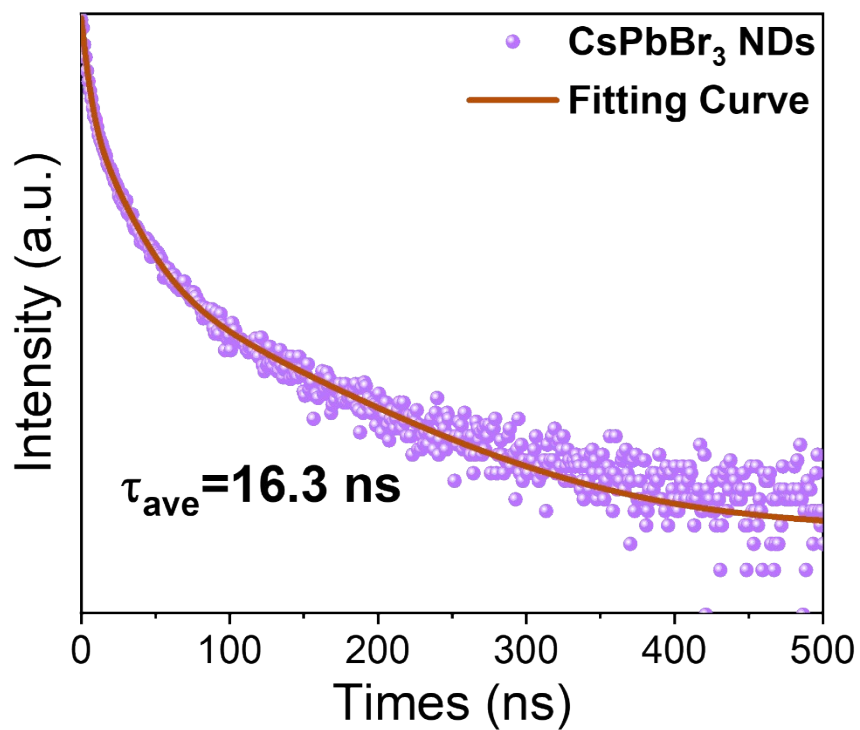

Figure S6. The fluorescence decay lifetime of CsPbBr<sub>3</sub> NDs.

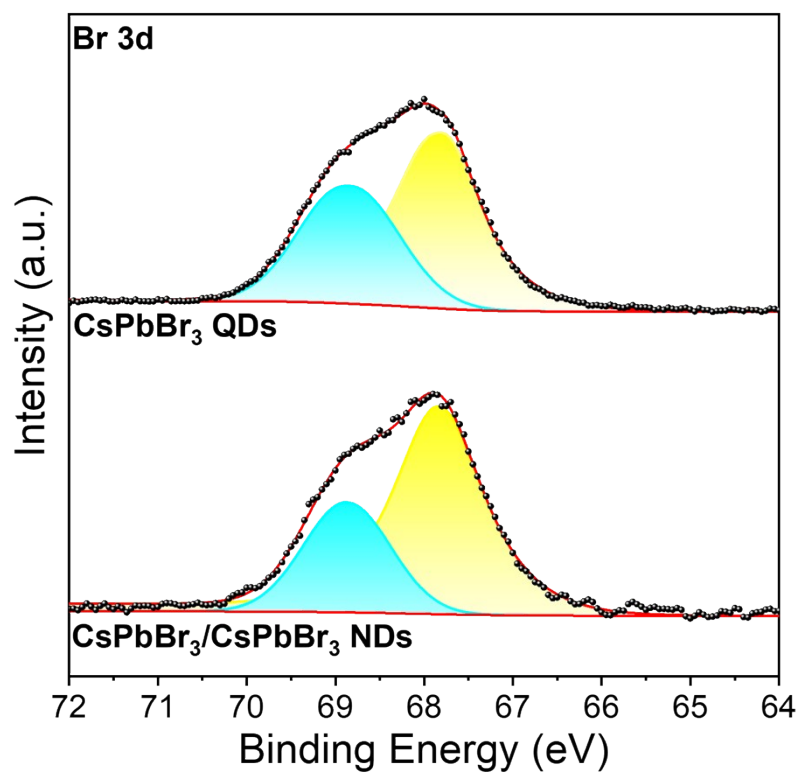

**Figure S7.** Br 3d XPS spectra of CsPbBr<sub>3</sub> QDs and CsPbBr<sub>3</sub>/CsPbBr<sub>3</sub> NDs.

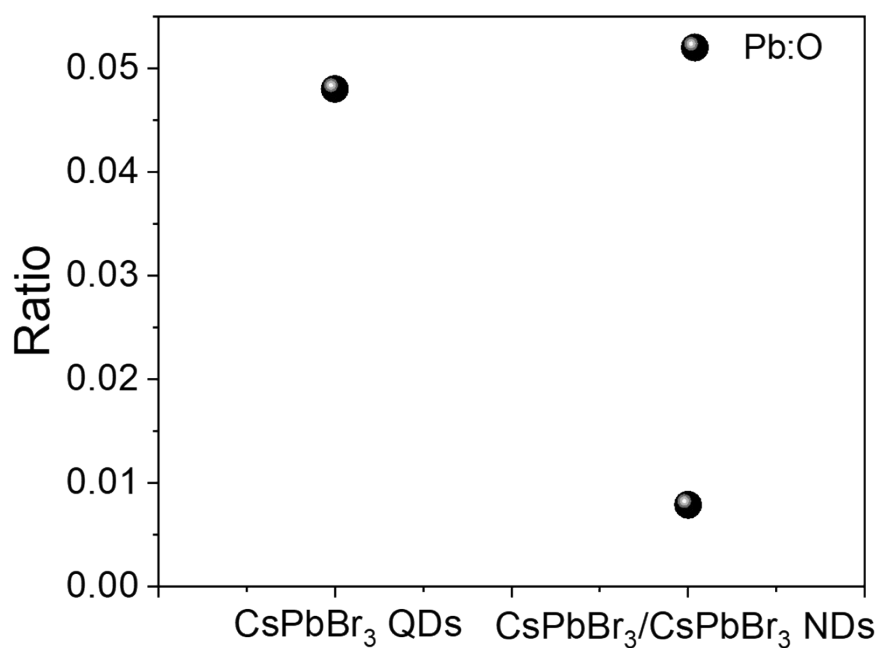

**Figure S8.** The elemental ratio of Pb to O on the surface of CsPbBr<sub>3</sub> QDs and CsPbBr<sub>3</sub>/CsPbBr<sub>3</sub> NDs.



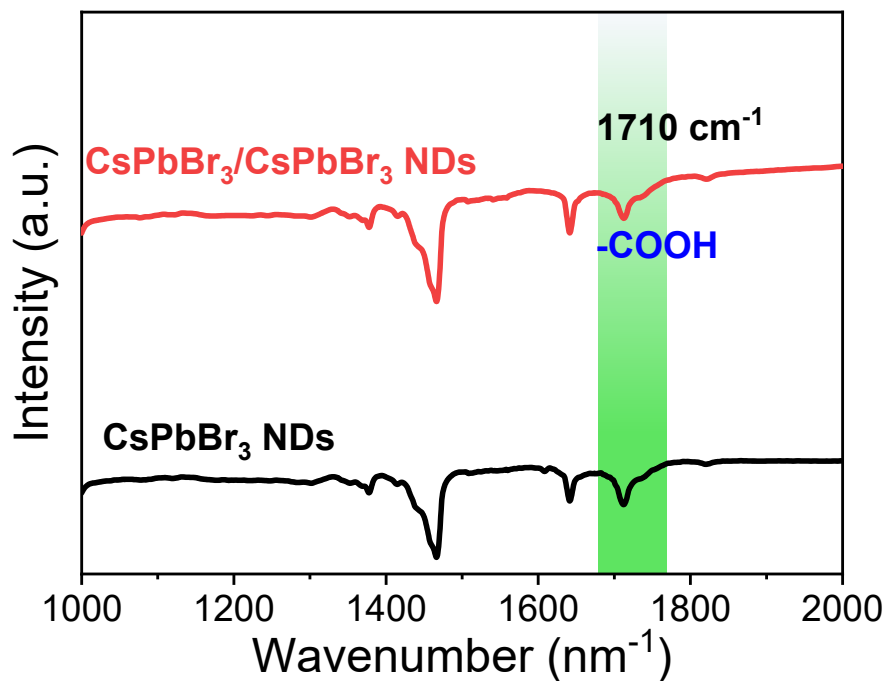

Figure S9. The FTIR data of CsPbBr<sub>3</sub> NDs and CsPbBr<sub>3</sub>/CsPbBr<sub>3</sub> NDs.

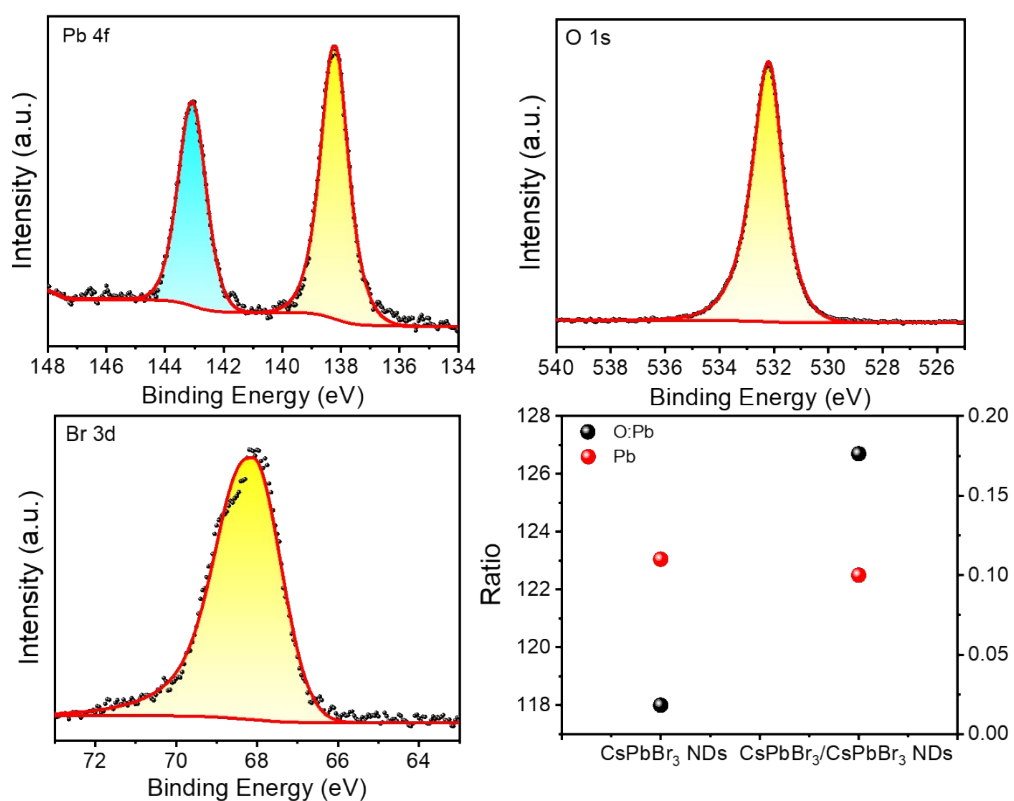

Figure S10. The Pb4f, O1s, and Br 3d XPS of CsPbBr<sub>3</sub> NDs and the atomic content of Pb and ratio of O/Pb on the surface of CsPbBr<sub>3</sub> NDs and CsPbBr<sub>3</sub>/CsPbBr<sub>3</sub> NDs.

Table S2. The average lifetime, radiative and non-radiative rate of CsPbBr<sub>3</sub> QDs, CsPbBr<sub>3</sub> NDs, and CsPbBr<sub>3</sub>/CsPbBr<sub>3</sub> NDs.

| Samples                                      | $\tau$ (ns) | QY (%) | $K_r$ (ns <sup>-1</sup> ) | $K_{nr}$ (ns <sup>-1</sup> ) |
|----------------------------------------------|-------------|--------|---------------------------|------------------------------|
| CsPbBr <sub>3</sub> QDs                      | 11.6        | 49     | 0.042                     | 0.0440                       |
| CsPbBr <sub>3</sub> NDs                      | 16.3        | 44     | 0.027                     | 0.0340                       |
| CsPbBr <sub>3</sub> /CsPbBr <sub>3</sub> NDs | 102.6       | 51     | 0.005                     | 0.0048                       |

Calculation of them is quoted from the article of Shen et.al.<sup>5</sup>

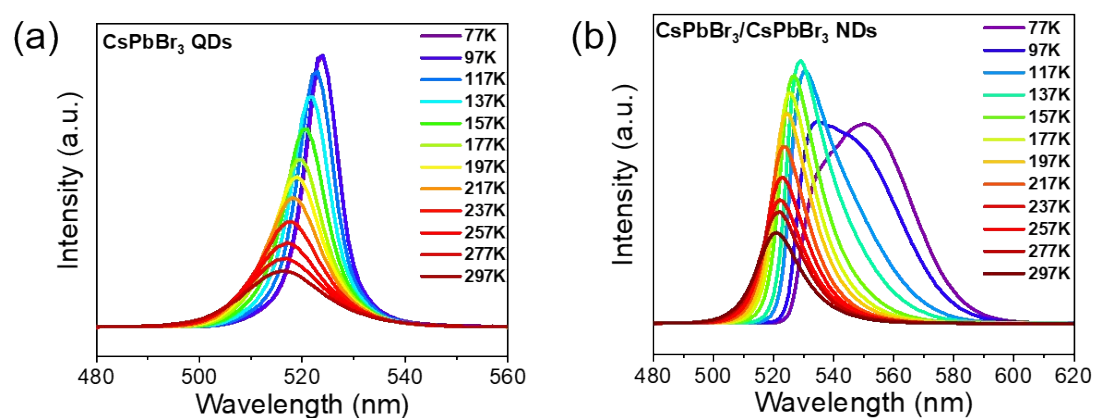

**Figure S11.** The temperature-dependent PL spectra of (a) CsPbBr<sub>3</sub> QDs and (b) CsPbBr<sub>3</sub>/CsPbBr<sub>3</sub> NDs measured from 77K to 297K.

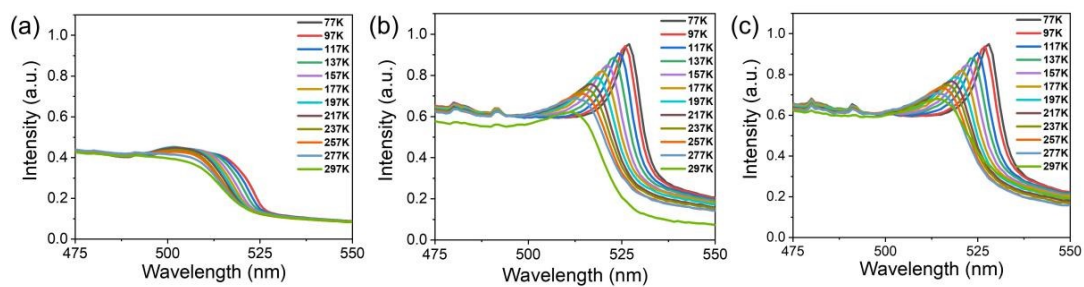

**Figure S12.** the temperature-dependent absorption spectra (a) CsPbBr<sub>3</sub> QDs, (b) CsPbBr<sub>3</sub> NDs, and (c) CsPbBr<sub>3</sub>/CsPbBr<sub>3</sub> NDs measured from 77K to 297K.

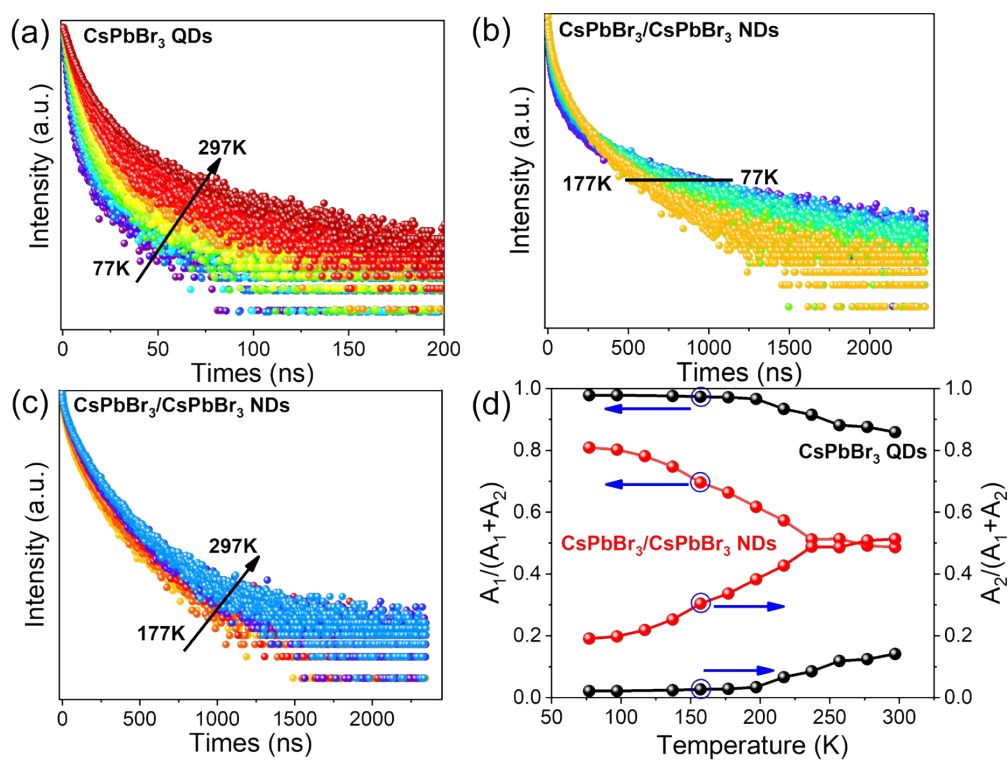

**Figure S13.** (a) The time-resolved fluorescence decay lifetime of QDs from 77K to 297K. The time-resolved fluorescence decay lifetime of CsPbBr<sub>3</sub>/CsPbBr<sub>3</sub> NDs in the temperature range of (b) 77K ~ 177K and (c) 177K ~ 297K. (d) Temperature-dependent ratios of the amplitude components  $A_1/(A_1+A_2)$  and  $A_2/(A_1+A_2)$ .

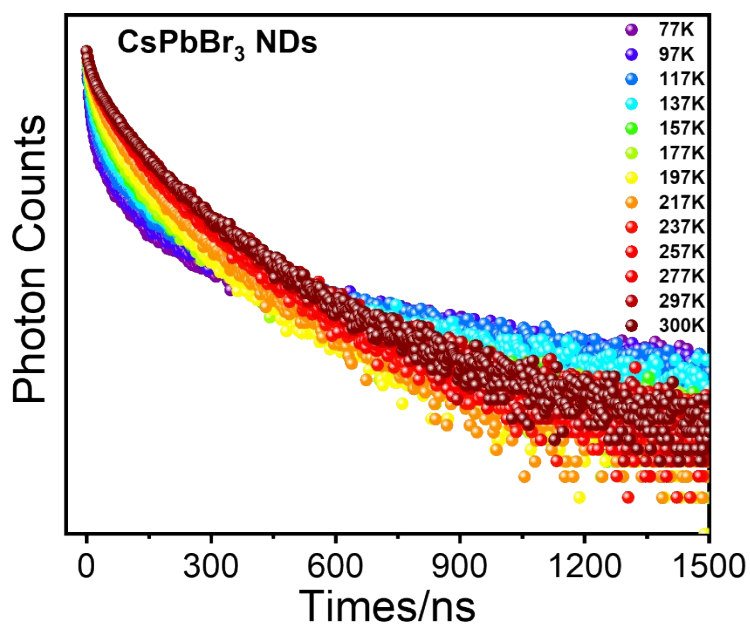

**Figure S14.** The time-resolved fluorescence decay lifetime of CsPbBr<sub>3</sub> NDs from 77K to 297K.

**Table S3.** Temperature-dependent Fluorescence lifetime data for CsPbBr<sub>3</sub> QDs via double exponential fitting.

| Temperature(K) | $\tau_1$ (ns) | $A_1$ | $\tau_2$ (ns) | $A_2$ | $\tau_{av}$ (ns) |
|----------------|---------------|-------|---------------|-------|------------------|
| 77             | 1.34          | 1.00  | 12.10         | 0.022 | 3.12             |
| 97             | 1.49          | 1.00  | 13.18         | 0.022 | 3.39             |
| 117            | 1.78          | 1.09  | 14.58         | 0.023 | 3.67             |
| 137            | 2.15          | 1.02  | 16.38         | 0.025 | 4.39             |
| 157            | 2.52          | 1.03  | 16.91         | 0.028 | 4.74             |
| 177            | 3.00          | 1.03  | 17.69         | 0.030 | 5.28             |
| 197            | 3.47          | 1.03  | 18.29         | 0.036 | 5.78             |
| 217            | 3.74          | 0.99  | 14.94         | 0.007 | 6.21             |
| 237            | 3.97          | 0.97  | 15.26         | 0.090 | 6.94             |
| 257            | 4.09          | 0.93  | 15.79         | 0.125 | 8.09             |
| 277            | 4.37          | 0.93  | 18.31         | 0.132 | 9.57             |
| 297            | 4.72          | 0.90  | 20.10         | 0.148 | 11.05            |

**Table S4.** Temperature-dependent fluorescence lifetime data for CsPbBr<sub>3</sub>/CsPbBr<sub>3</sub> NDs via double exponential fitting.

| Temperature(K) | $\tau_1$ (ns) | $A_1$ | $\tau_2$ (ns) | $A_2$ | $\tau_{av}$ (ns) |
|----------------|---------------|-------|---------------|-------|------------------|
| 77             | 4.80          | 0.78  | 79.30         | 0.18  | 64.1             |
| 97             | 5.50          | 0.77  | 88.20         | 0.19  | 71.5             |
| 117            | 7.30          | 0.75  | 97.40         | 0.21  | 78.4             |
| 137            | 9.35          | 0.71  | 100.50        | 0.24  | 80.8             |
| 157            | 11.06         | 0.66  | 93.95         | 0.29  | 76.4             |
| 177            | 11.80         | 0.63  | 90.60         | 0.32  | 74.5             |
| 197            | 12.94         | 0.59  | 90.40         | 0.37  | 75.9             |
| 217            | 15.84         | 0.55  | 96.10         | 0.41  | 81.6             |
| 237            | 17.35         | 0.49  | 104.50        | 0.47  | 91.6             |
| 257            | 17.22         | 0.49  | 108.90        | 0.46  | 95.8             |
| 277            | 17.20         | 0.47  | 110.50        | 0.49  | 98.3             |
| 297            | 17.84         | 0.46  | 115.80        | 0.49  | 103.3            |

## References

1. B. Chon, J. Bang, J. Park, C. Jeong, J. H. Choi, J. B. Lee, T. Joo and S. Kim, *J. Phys. Chem. C*, 2011, **115**, 436-442.
2. J. Li, X. Yuan, P. Jing, J. Li, M. Wei, J. Hua, J. Zhao and L. Tian, *RSC Adv.*, 2016, **6**, 78311-78316.
3. B. Ai, C. Liu, Z. Deng, J. Wang, J. Han and X. Zhao, *Phys. Chem. Chem. Phys.*, 2017, **19**, 17349-17355.
4. K. Wei, Z. Xu, R. Chen, X. Zheng, X. Cheng and T. Jiang, *Opt. Lett.*, 2016, **41**, 3821.
5. X. Shen, Y. Zhang, S. V. Kershaw, T. Li, C. Wang, X. Zhang, W. Wang, D. Li, Y. Wang, M. Lu, L. Zhang, C. Sun, D. Zhao, G. Qin, X. Bai, W. W. Yu and A. L. Rogach, *Nano Lett.*, 2019, **19**, 1552-1559.
